# Supplementary material for: Coronary perforation incidence, outcomes and temporal trends (COPIT): a systematic review and meta-analysis
Source: PubMed Central journal article supplement — Open Heart. 2022 Oct 21;9(2):e002076. doi: 10.1136/openhrt-2022-002076 (PMC9594565; doi:10.1136/openhrt-2022-002076), 2022-10-21

## COPIT Supplementary Appendix

### Contents

|                                        |   |
|----------------------------------------|---|
| Search Strategy .....                  | 2 |
| Inclusion and Exclusion Criteria ..... | 2 |
| Supplementary Appendix Figure 1.....   | 3 |
| Supplementary Appendix Figure 2.....   | 4 |
| Supplementary Appendix Figure 3.....   | 6 |

## Search Strategy

(coronary art\*.mp OR coronary vess\*.mp OR coronary.mp OR coronary artery OR coronary blood vessel OR coronary stenting OR percutaneous coronary intervention OR coronary artery disease)

AND

(perforation or perforation.mp OR coronary artery perforation OR artery perforation)

## Inclusion and Exclusion Criteria

Studies were included if they:

- 1) Reported the number of perforations within the cohort of patients undergoing percutaneous coronary interventions (PCIs)
- 2) Reported a range of time during which these procedures were performed
- 3) Were randomised controlled trials, cohort studies or cross-sectional analysis.

Studies were excluded if they:

- 1) Were case reports and case series
- 2) Were studies detailing results in PCI population subgroups (e.g. Chronic total Occlusion, atheroablative devices or other specific interventional decies)
- 3) Reported on non-routine procedural practices

## Supplementary Appendix Figure 1

Forest plot of included studies reporting incidence of Ellis Grade 3 perforation. Data presented as percentage with 95% confidence interval.

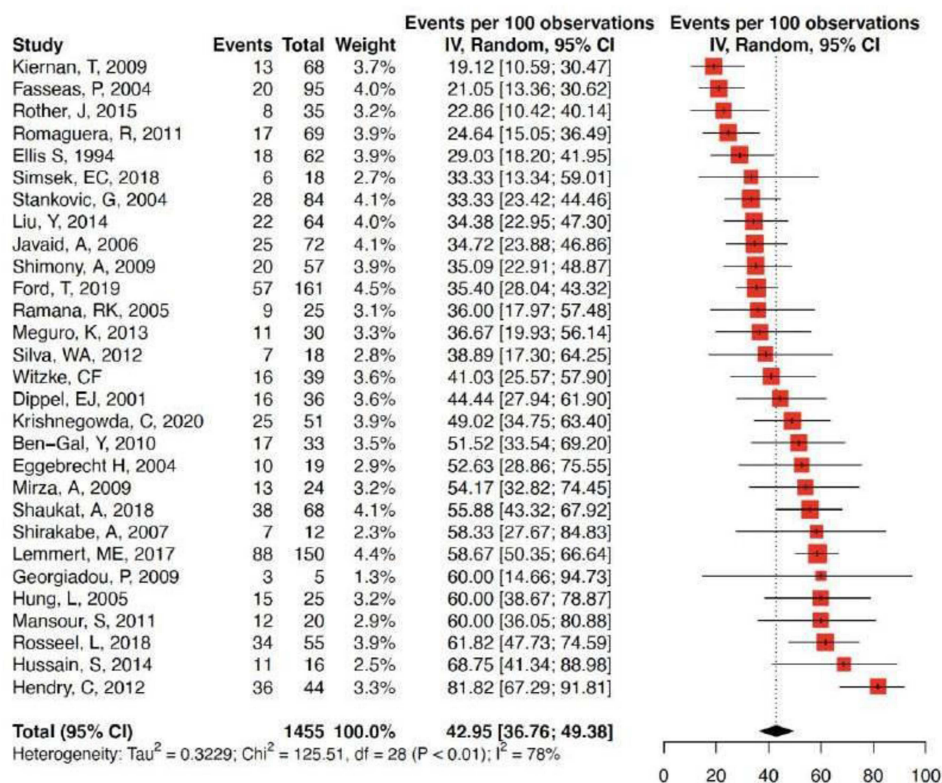

## Supplementary Appendix Figure 2

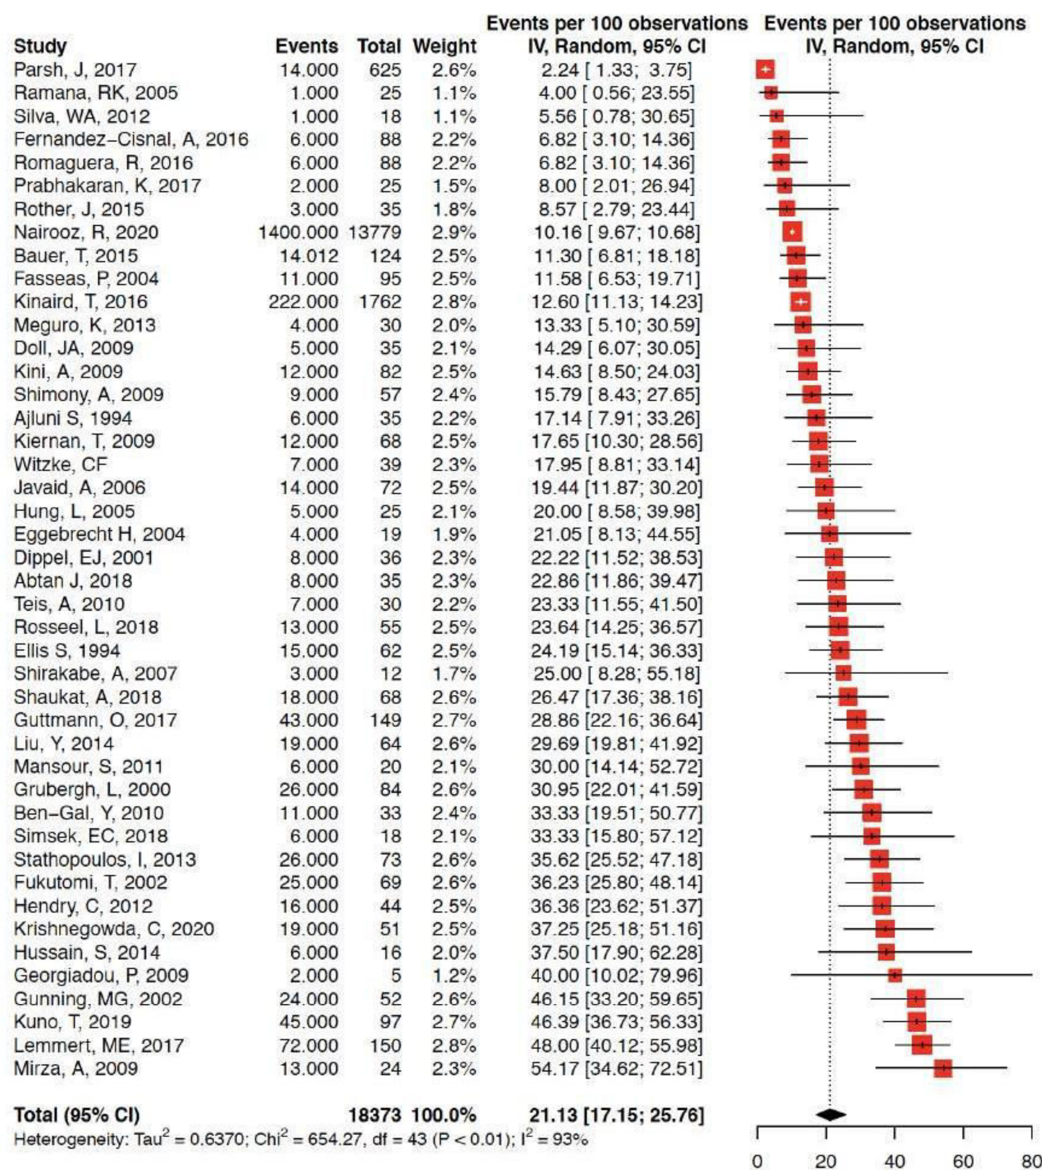

A Forest plot of included studies reporting cardiac tamponade due to coronary perforation. Data presented as percentage with 95% confidence interval.



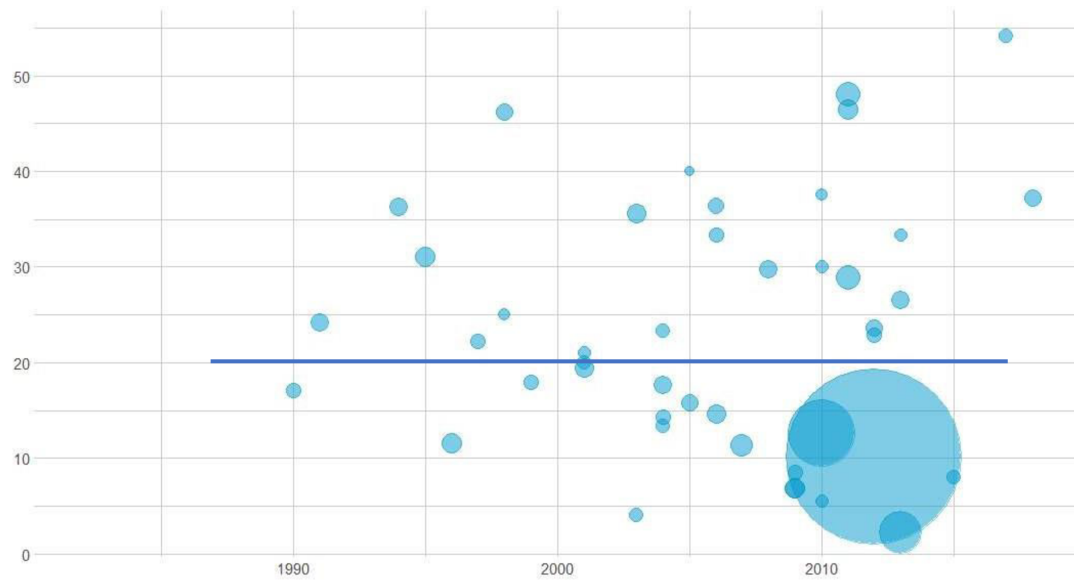

**B** Temporal trend of cardiac tamponade due to coronary perforation. Bubble plot illustrating stable incidence of cardiac tamponade due to coronary perforation over the last three decades. Sample size of study represented by bubble size.

### Supplementary Appendix Figure 3

Bubble plot representation of incidence of coronary perforation as related to age. Sample size of study represented by bubble size.

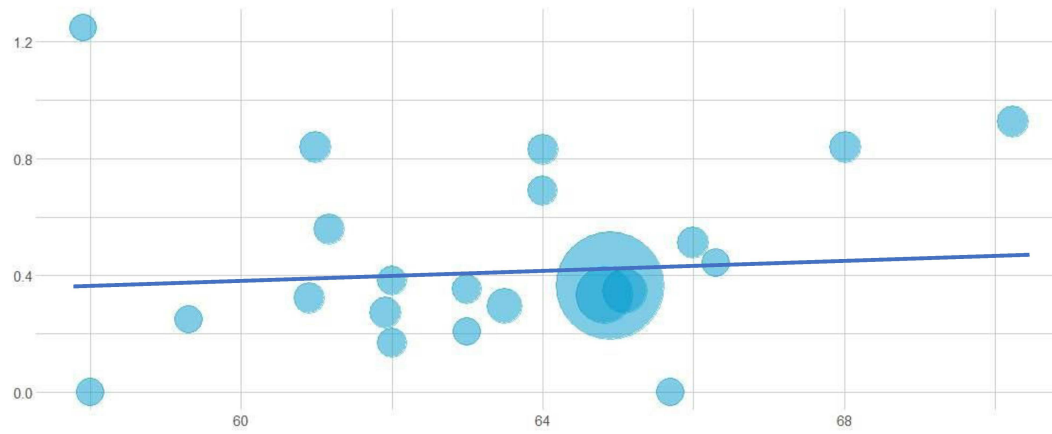

Supplement: openhrt-2022-002076supp001.pdf [file openhrt-2022-002076supp001.pdf]
